# Supplementary material
Source: PubMed Central journal article supplement (PMC3334332)
Supplement: NIHMS366698-supplement-12_si_027.pdf [file NIHMS366698-supplement-12_si_027.pdf]

- Akopians, A., Runyan, S.A., and Phelps, P.E. (2003). Expression of L1 decreases during postnatal development of rat spinal cord. *J Comp Neurol* 467, 375-388.
- Dahl, D., Strocchi, P., and Bignami, A. (1982). Vimentin in the central nervous system. A study of the mesenchymal-type intermediate filament-protein in Wallerian degeneration and in postnatal rat development by two-dimensional gel electrophoresis. *Differentiation* 22, 185-190.
- Dauch, P., Masuo, Y., Vincent, J.P., and Checler, F. (1992). Endopeptidase 24-16 in murines: tissue distribution, cerebral regionalization, and ontogeny. *J Neurochem* 59, 1862-1867.
- Gibney, G.T., Zhang, J.H., Douglas, R.M., Haddad, G.G., and Xia, Y. (2002). Na(+)/Ca(2+) exchanger expression in the developing rat cortex. *Neuroscience* 112, 65-73.
- Gronholm, M., Teesalu, T., Tynnela, J., Piltti, K., Bohling, T., Wartiovaara, K., Vaheri, A., and Carpen, O. (2005). Characterization of the NF2 protein merlin and the ERM protein ezrin in human, rat, and mouse central nervous system. *Mol Cell Neurosci* 28, 683-693.
- Ihnatovych, I., Novotny, J., Haugvicova, R., Bourova, L., Mares, P., and Svoboda, P. (2002). Opposing changes of trimeric G protein levels during ontogenetic development of rat brain. *Brain Res Dev Brain Res* 133, 57-67.
- Jalava, N.S., Lopez-Picon, F.R., Kukko-Lukjanov, T.K., and Holopainen, I.E. (2007). Changes in microtubule-associated protein-2 (MAP2) expression during development and after status epilepticus in the immature rat hippocampus. *Int J Dev Neurosci* 25, 121-131.
- Janmohamed, A., Hernandez, D., Phillips, I.R., and Shephard, E.A. (2004). Cell-, tissue-, sex- and developmental stage-specific expression of mouse flavin-containing monooxygenases (Fmos). *Biochem Pharmacol* 68, 73-83.
- Jiang, Y.Q., and Oblinger, M.M. (1992). Differential regulation of beta III and other tubulin genes during peripheral and central neuron development. *J Cell Sci* 103 ( Pt 3), 643-651.
- Kaplan, M.P., Chin, S.S., Fliegner, K.H., and Liem, R.K. (1990). Alpha-internexin, a novel neuronal intermediate filament protein, precedes the low molecular weight neurofilament protein (NF-L) in the developing rat brain. *J Neurosci* 10, 2735-2748.
- Khalyfa, A., Bourbeau, D., Chen, E., Petroulakis, E., Pan, J., Xu, S., and Wang, E. (2001). Characterization of elongation factor-1A (eEF1A-1) and eEF1A-2/S1 protein expression in normal and wasted mice. *J Biol Chem* 276, 22915-22922.
- Lewis, S.A., Lee, M.G., and Cowan, N.J. (1985). Five mouse tubulin isotypes and their regulated expression during development. *J Cell Biol* 101, 852-861.

Little, E., Tocco, G., Baudry, M., Lee, A.S., and Schreiber, S.S. (1996). Induction of glucose-regulated protein (glucose-regulated protein 78/BiP and glucose-regulated protein 94) and heat shock protein 70 transcripts in the immature rat brain following status epilepticus. *Neuroscience* 75, 209-219.

Lopez-Picon, F.R., Uusi-Oukari, M., and Holopainen, I.E. (2003). Differential expression and localization of the phosphorylated and nonphosphorylated neurofilaments during the early postnatal development of rat hippocampus. *Hippocampus* 13, 767-779.

Mayanil, C.S., and Knepper, P.A. (1993). Synaptic vesicle and synaptic membrane glycoproteins during pre- and postnatal development of mouse cerebral cortex, cerebellum and spinal cord. *Dev Neurosci* 15, 133-145.

McNamara, R.K., and Lenox, R.H. (1998). Distribution of the protein kinase C substrates MARCKS and MRP in the postnatal developing rat brain. *J Comp Neurol* 397, 337-356.

Murakami, K., and Miyamoto, K. (1982). Polypeptide elongation factors of the developing chick brain. *J Neurochem* 38, 1315-1322.

Nicotra, A., Pierucci, F., Parvez, H., and Senatori, O. (2004). Monoamine oxidase expression during development and aging. *Neurotoxicology* 25, 155-165.

Piao, X., Hill, R.S., Bodell, A., Chang, B.S., Basel-Vanagaite, L., Straussberg, R., Dobyms, W.B., Qasrawi, B., Winter, R.M., Innes, A.M., *et al.* (2004). G protein-coupled receptor-dependent development of human frontal cortex. *Science* 303, 2033-2036.

Poliard, A., Feldmann, G., and Bernuau, D. (1988). Alpha fetoprotein and albumin gene transcripts are detected in distinct cell populations of the brain and kidney of the developing rat. *Differentiation* 39, 59-65.

Richard, M., Giannetti, N., Saucier, D., Sacquet, J., Jourdan, F., and Pellier-Monnin, V. (2005). Neuronal expression of Nogo-A mRNA and protein during neurite outgrowth in the developing rat olfactory system. *Eur J Neurosci* 22, 2145-2158.

Sugiura, Y., and Mori, N. (1995). SCG10 expresses growth-associated manner in developing rat brain, but shows a different pattern to p19/stathmin or GAP-43. *Brain Res Dev Brain Res* 90, 73-91.

Wang, L.H., and Strittmatter, S.M. (1996). A family of rat CRMP genes is differentially expressed in the nervous system. *J Neurosci* 16, 6197-6207.

Zhang, X., Szabo, E., Michalak, M., and Opas, M. (2007). Endoplasmic reticulum stress during the embryonic development of the central nervous system in the mouse. *Int J Dev Neurosci* 25, 455-463.
