# Supplementary material
Source: PubMed Central journal article supplement (PMC3334332)

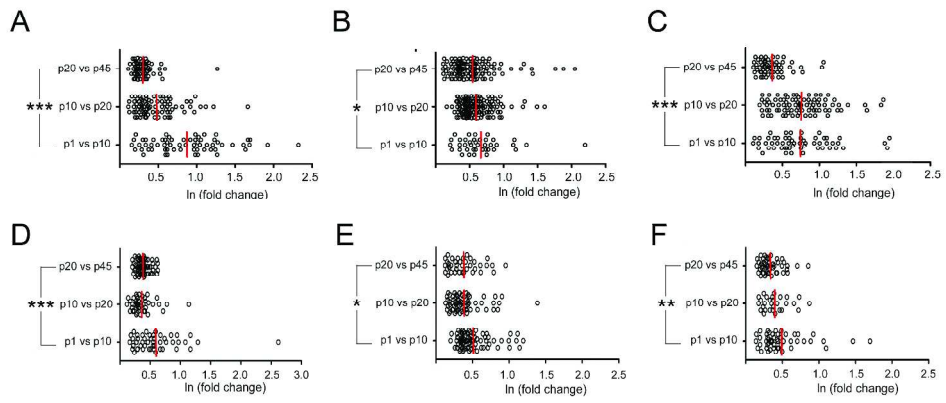

304x148mm (600 x 600 DPI)

Supplement: NIHMS366698-supplement-1_si_001.pdf [file NIHMS366698-supplement-1_si_001.pdf]

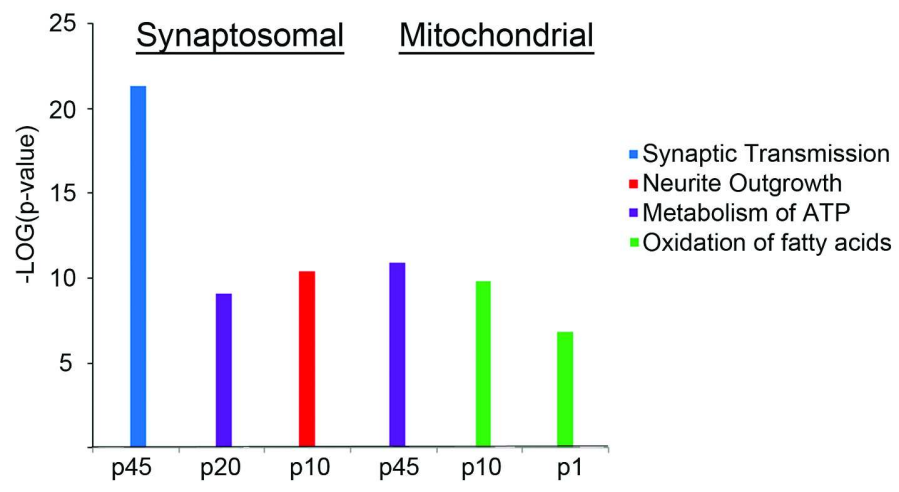

203x117mm (600 x 600 DPI)

Supplement: NIHMS366698-supplement-2_si_002.pdf [file NIHMS366698-supplement-2_si_002.pdf]

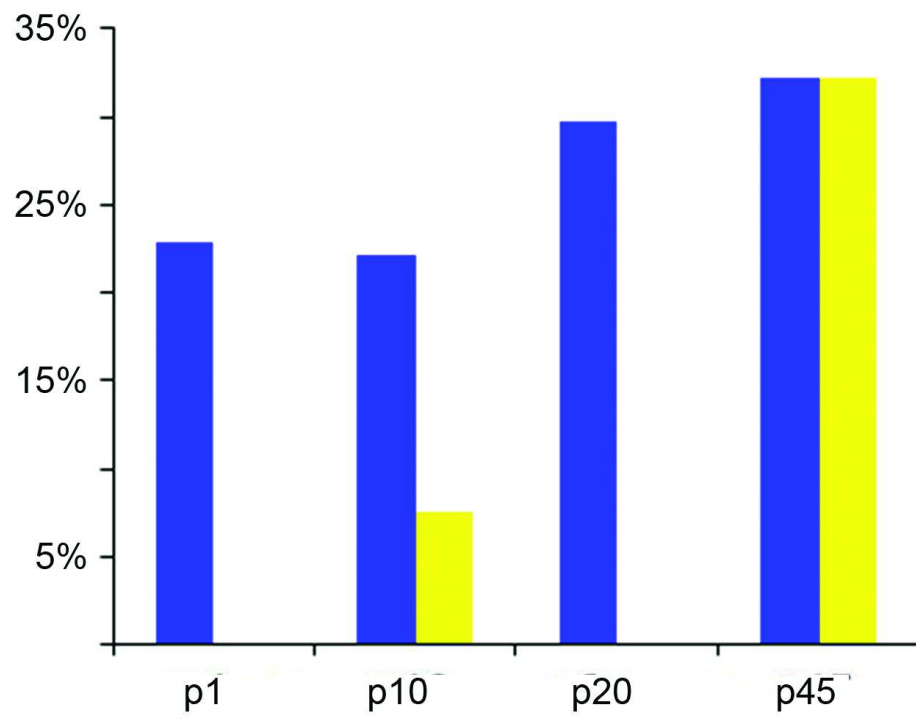

57x44mm (600 x 600 DPI)

Supplement: NIHMS366698-supplement-3_si_003.pdf [file NIHMS366698-supplement-3_si_003.pdf]

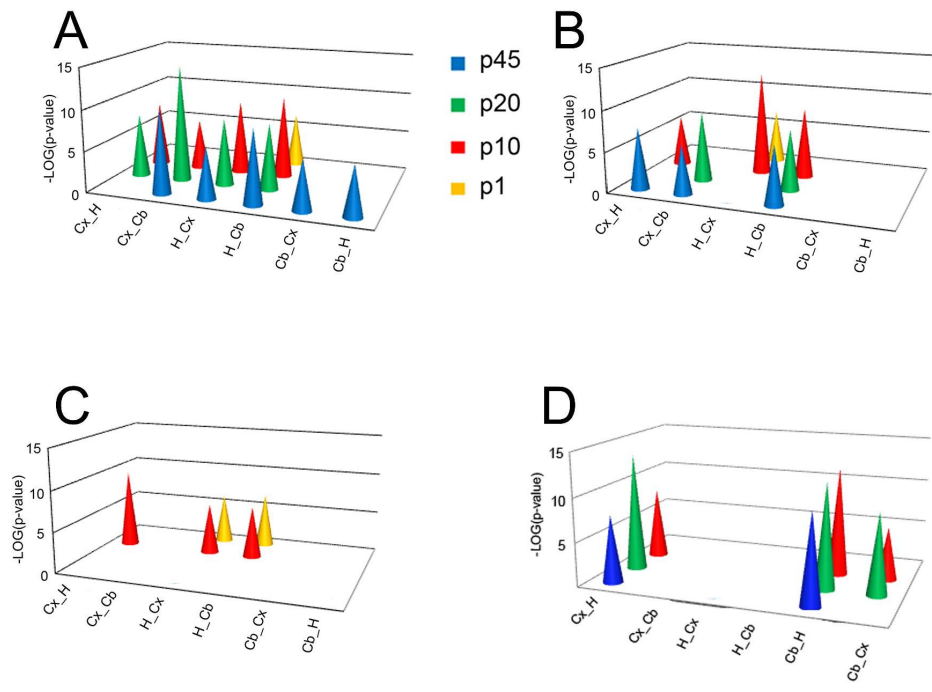

203x152mm (700 x 700 DPI)

Supplement: NIHMS366698-supplement-4_si_004.pdf [file NIHMS366698-supplement-4_si_004.pdf]

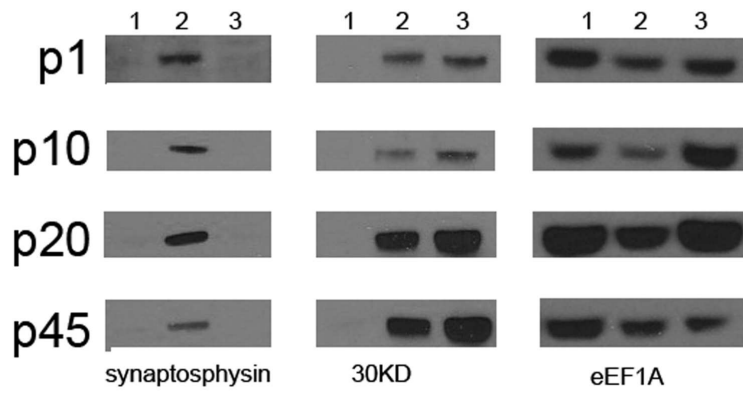

254x121mm (600 x 600 DPI)

Supplement: NIHMS366698-supplement-5_si_005.pdf [file NIHMS366698-supplement-5_si_005.pdf]
